# Supplementary material for: Health profile of residents of retirement villages in Auckland, New Zealand: findings from a cross-sectional survey with health assessment
Source: PubMed Central journal article supplement — BMJ Open. 2020 Sep 18;10(9):e035876. doi: 10.1136/bmjopen-2019-035876 (PMC7511621; doi:10.1136/bmjopen-2019-035876), 2020-09-18
Supplement: bmjopen-2019-035876supp002.pdf [file bmjopen-2019-035876supp002.pdf]

## Appendix Table of Missing data

| Variable                                                                                               | No. of missing | Imputation method | Imputed value                   |
|--------------------------------------------------------------------------------------------------------|----------------|-------------------|---------------------------------|
| Household composition                                                                                  | 1              | Mode              | Living alone                    |
| Tenure                                                                                                 | 7              | Mode              | Right-to-occupy agreement       |
| Years since the move into this village                                                                 | 17             | Median            | 3.4 years                       |
| Factors in decision to enter village                                                                   |                |                   |                                 |
| To smaller home, reduce maintenance                                                                    | 6              | Mode              | Yes                             |
| Less stressed lifestyle                                                                                | 16             | Mode              | No                              |
| Assistance current/future health issues                                                                | 7              | Mode              | Yes                             |
| Other services offered within the village                                                              | 31             | Not imputed       |                                 |
| Security and safety                                                                                    | 18             | Mode              | No                              |
| To be independent of family                                                                            | 13             | Mode              | No                              |
| Improved social life / access activities                                                               | 16             | Mode              | No                              |
| Social and/or emotional support                                                                        | 16             | Mode              | No                              |
| Financial factors, affordability                                                                       | 19             | Mode              | No                              |
| Household maintenance/chores                                                                           | 20             | Mode              | No                              |
| Push pressure from family                                                                              | 15             | Mode              | No                              |
| Particular events prompted village entry                                                               | 1              | Mode              | No                              |
| How would you describe your quality of life?                                                           | 3              | Mode              | Very good                       |
| Overall how satisfied are you with living in this retirement village?                                  | 6              | Mode              | Very satisfied                  |
| (From survey) Would you say that you ...                                                               | 6              | Mode              | Never feel lonely               |
| Number of days (of last 3 days) went out of house/building?                                            | 1              | Mode              | 3 days                          |
| Social relationships in the last 3 days (shown only if 'yes')                                          |                |                   |                                 |
| Participated in social activities of long-standing interest                                            | 1              | Mode              | In last 3 days                  |
| Had visit by long-standing friend/family                                                               | 1              | Mode              | In last 3 days                  |
| Had other interaction with long-standing friend/family                                                 | 1              | Mode              | In last 3 days                  |
| In terms of using the internet, do you ...                                                             | 3              | Mode              | Use the internet without help   |
| How much does faith in God and/or a spiritual element to your life influence how you live?             | 7              | Mode              | Not at all                      |
| Do you attend church or religious meetings?                                                            | 7              | Mode              | No, except on special occasions |
| Self-rated health                                                                                      | 5              | Mode              | good                            |
| Highest number of (alcoholic) drinks in single sitting in last 14 days?                                | 1              | Mode              | One                             |
| Hours exercise/physical activity in last 3 days                                                        | 1              | Mode              | Less than one hour              |
| Paid support or services over the past two weeks (shown only if 'yes')                                 |                |                   |                                 |
| Homecare (e.g. cleaning, laundry, shopping)                                                            | 6              | Mode              | No                              |
| Personal care (e.g. showering, dressing)                                                               | 7              | Mode              | No                              |
| Nursing or similar services                                                                            | 10             | Mode              | No                              |
| How many prescribed medications did you take yesterday (over a 24hr period)? (from survey, 42 missing) | 42             | Not imputed       |                                 |
| Needed health services over past 12 months but did not access (shown only if 'yes')                    |                |                   |                                 |
| Optician                                                                                               | 1              | Mode              | No                              |

|                                                       |    |      |                            |
|-------------------------------------------------------|----|------|----------------------------|
| GP                                                    | 1  | Mode | No                         |
| Audiologist                                           | 14 | Mode | No                         |
| Dentist                                               | 7  | Mode | No                         |
| <b>Prevention, monitoring (shown only if 'yes')</b>   |    |      |                            |
| Blood pressure measured in last year                  | 1  | Mode | Yes                        |
| Eye exam in last year                                 | 1  | Mode | Yes                        |
| Influenza vaccine in last year                        | 1  | Mode | Yes                        |
| Dental exam in last year                              | 1  | Mode | Yes                        |
| Hearing exam in last 2 years                          | 1  | Mode | Yes                        |
| Colonoscopy in last 5 years                           | 1  | Mode | No                         |
| Mammogram /breast exam in last 2 years (women only)   | 8  | Mode | No                         |
| <b>Self-reported symptoms (shown only if present)</b> |    |      |                            |
| Fatigue                                               | 1  | Mode | None                       |
| Difficulty falling asleep                             | 1  | Mode | No present                 |
| Bladder incontinence                                  | 1  | Mode | Continent                  |
| <b>Selected interRAI scales</b>                       |    |      |                            |
| Deaf/blind severity                                   | 1  | Mode | Both senses intact (0)     |
| Depression rating scale (DRS scale)                   | 1  | Mode | 0                          |
| Functional Supplement triggered                       | 1  | Mode | Not triggered              |
| IADL Capacity Hierarchy Scale (range 0-6)             | 2  | Mode | 0                          |
| <b>Selected interRAI CAPs indicating unmet need</b>   |    |      |                            |
| Cardiorespiratory conditions CAP triggered            | 1  | Mode | Not triggered              |
| Pain CAP triggered                                    | 1  | Mode | Not triggered              |
| Physical activities promotion CAP triggered (L1)      | 1  | Mode | Not triggered              |
| Informal support CAP triggered (L1)                   | 2  | Mode | Not triggered              |
| Social relationship CAP triggered (L1)                | 1  | Mode | Not triggered              |
| Mood CAP triggered                                    | 1  | Mode | Not triggered              |
| Urinary incontinence CAP triggered                    | 1  | Mode | Continent at baseline (L1) |
| Falls CAP triggered                                   | 1  | Mode | Not triggered              |
| IADL CAP triggered (L1)                               | 2  | Mode | Not triggered              |
| Appropriate medications CAP triggered (L1)            | 1  | Mode | Not triggered              |
